# Supplementary material
Source: PubMed Central journal article supplement (PMC1855185)

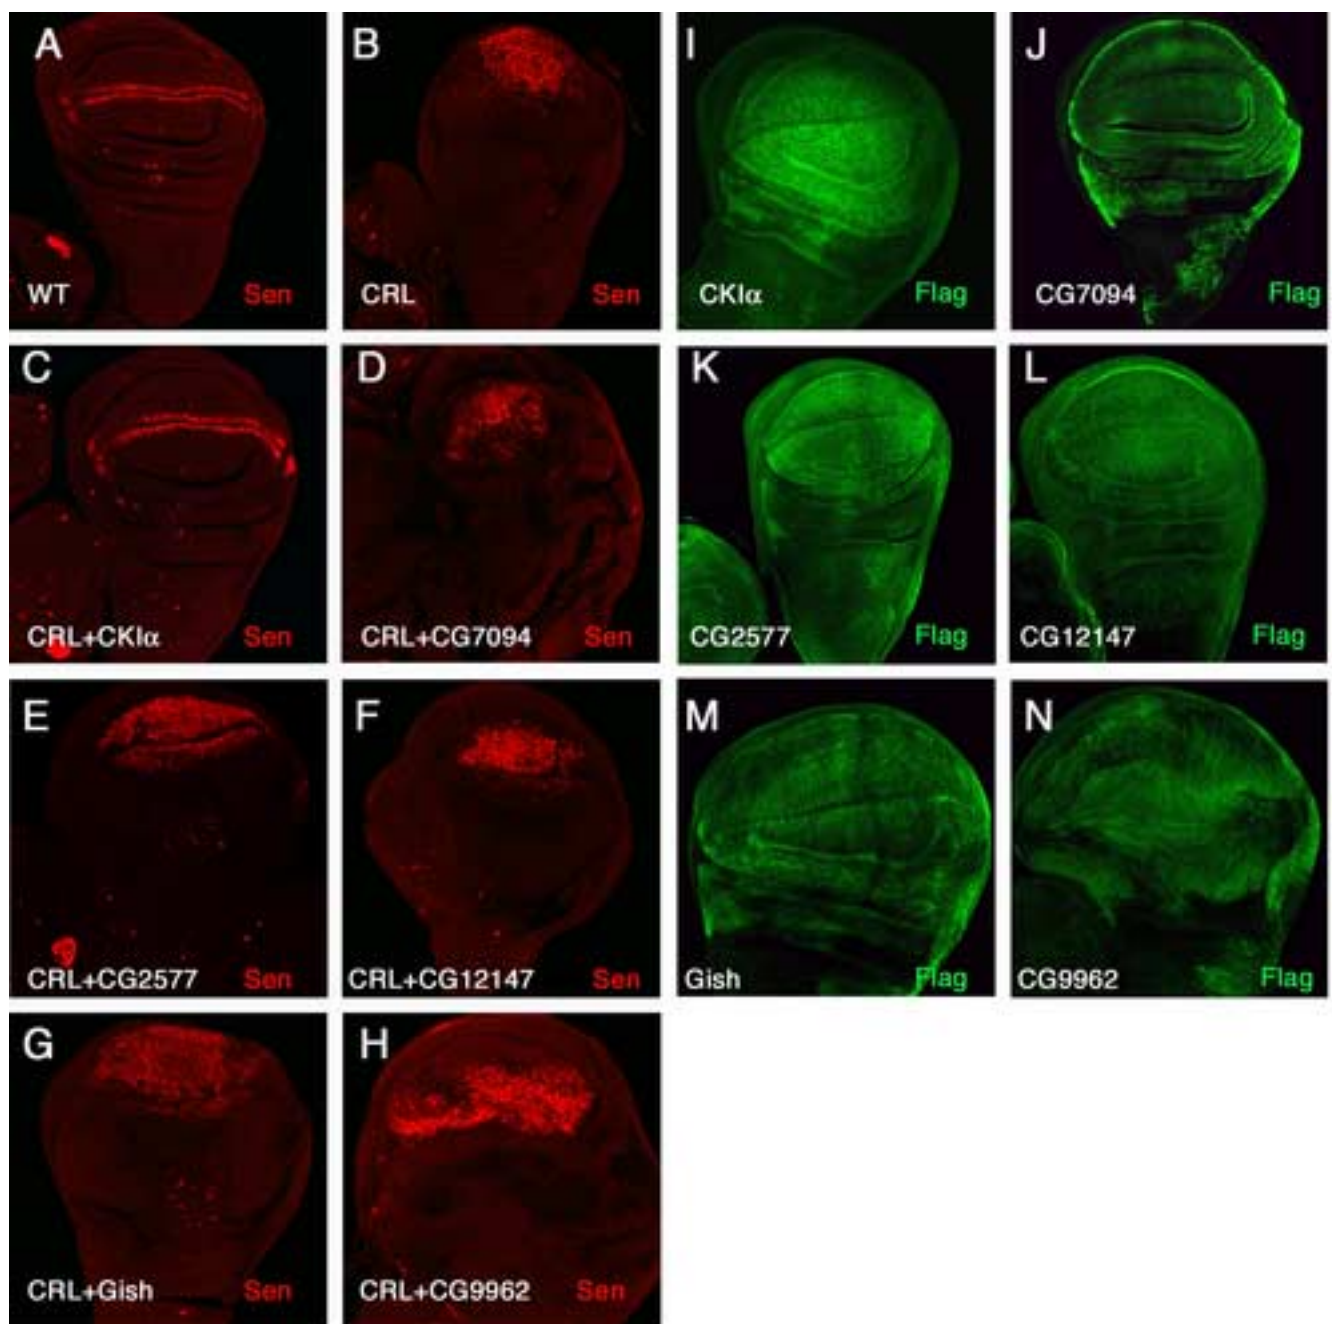

Supplement: NIHMS13442-supplement.pdf [file NIHMS13442-supplement.pdf]
